# Supplementary figures and images for: Irisin Regulates Hepatic Glucose Metabolism via AMPK and PI3K/Akt Activation
Source: Hindawi journal article supplement (doi:10.1155/2022/1946960), 2022-04-22

### Supplementary Figures 1

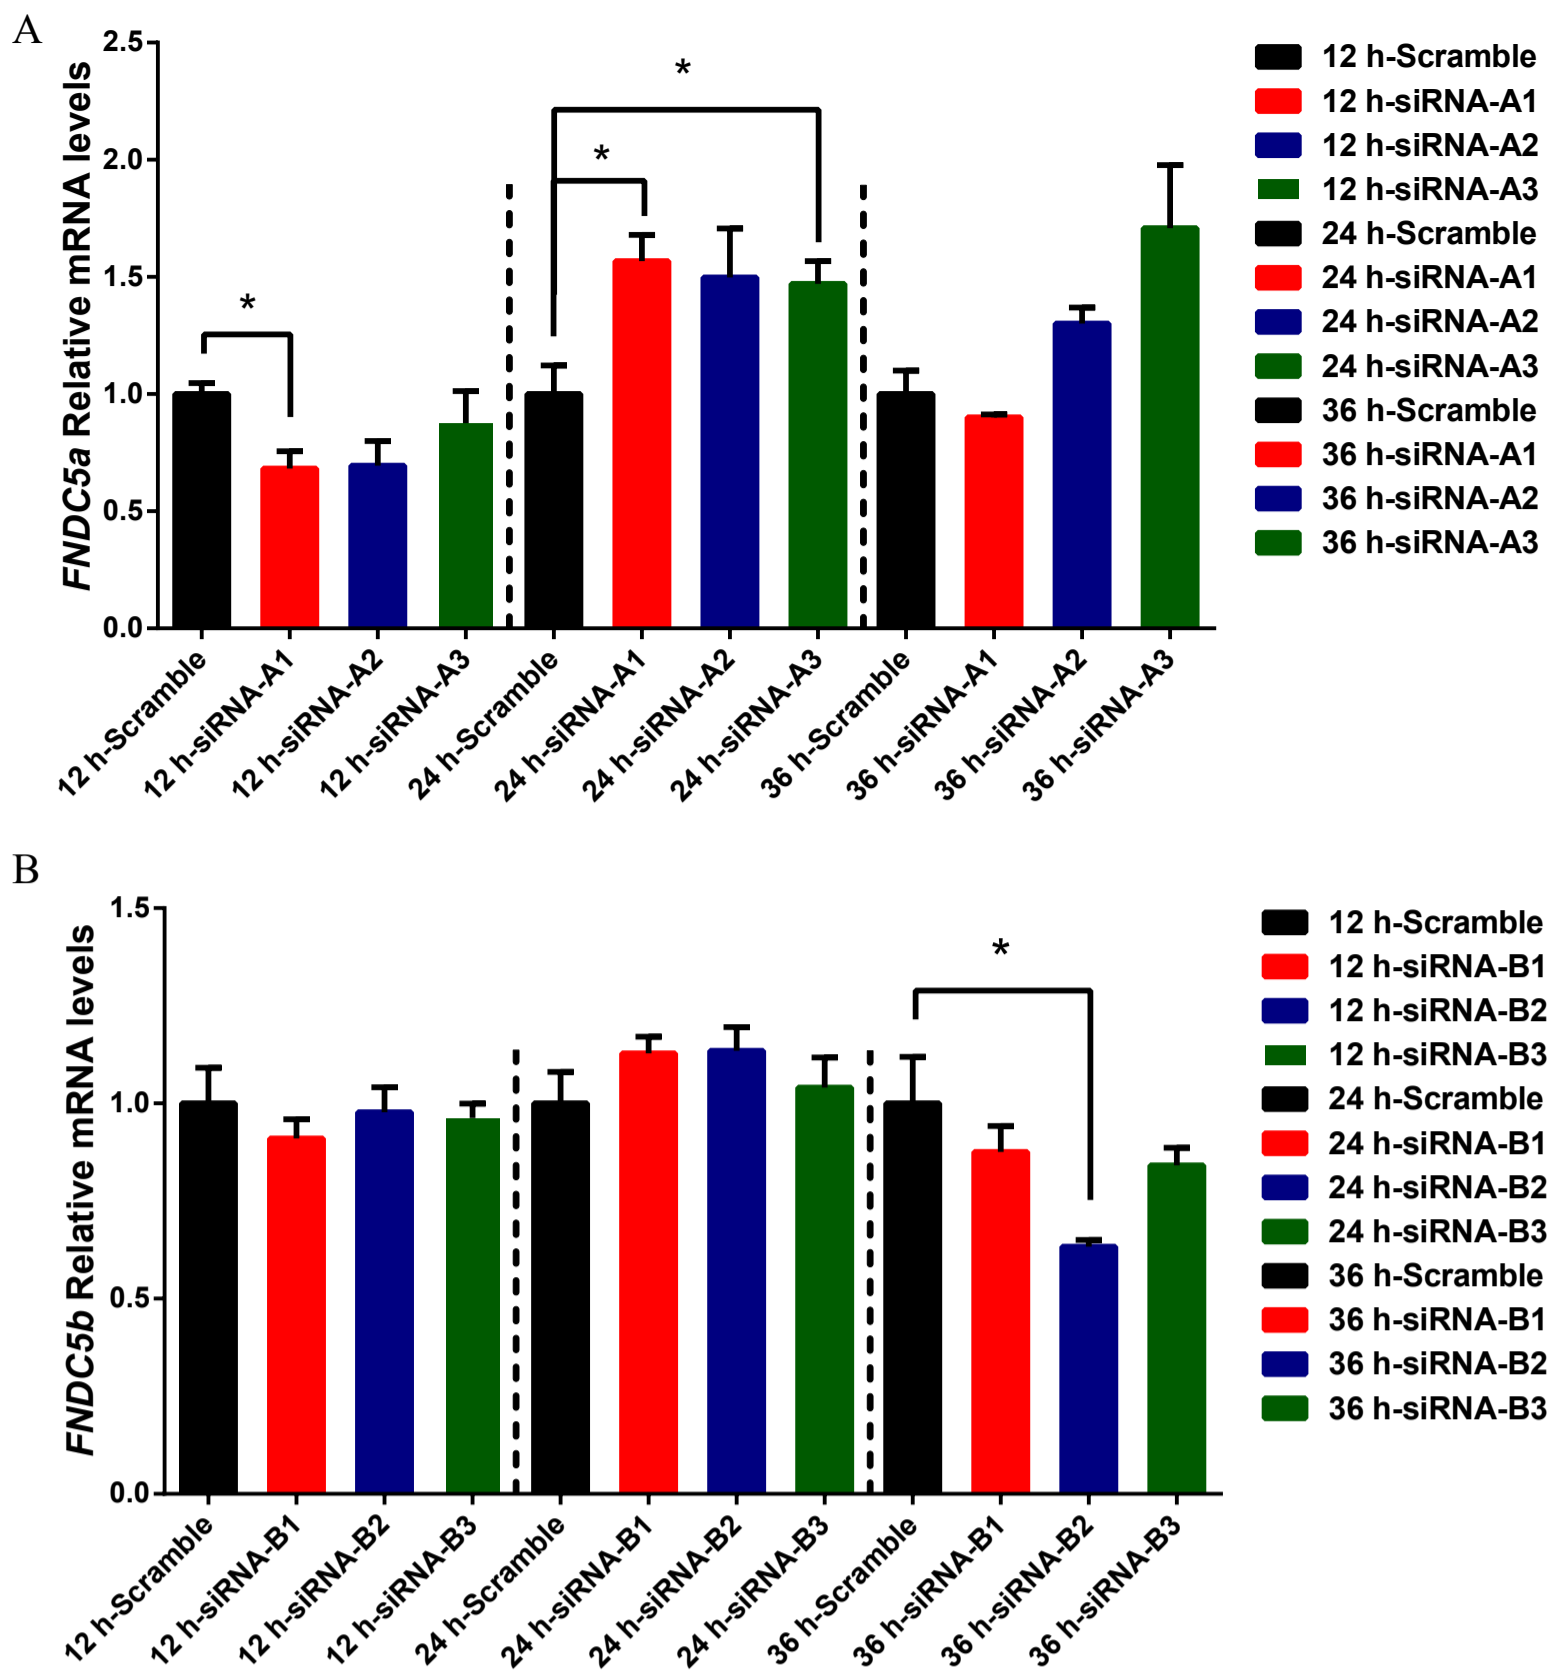

### Supplementary Figures 2

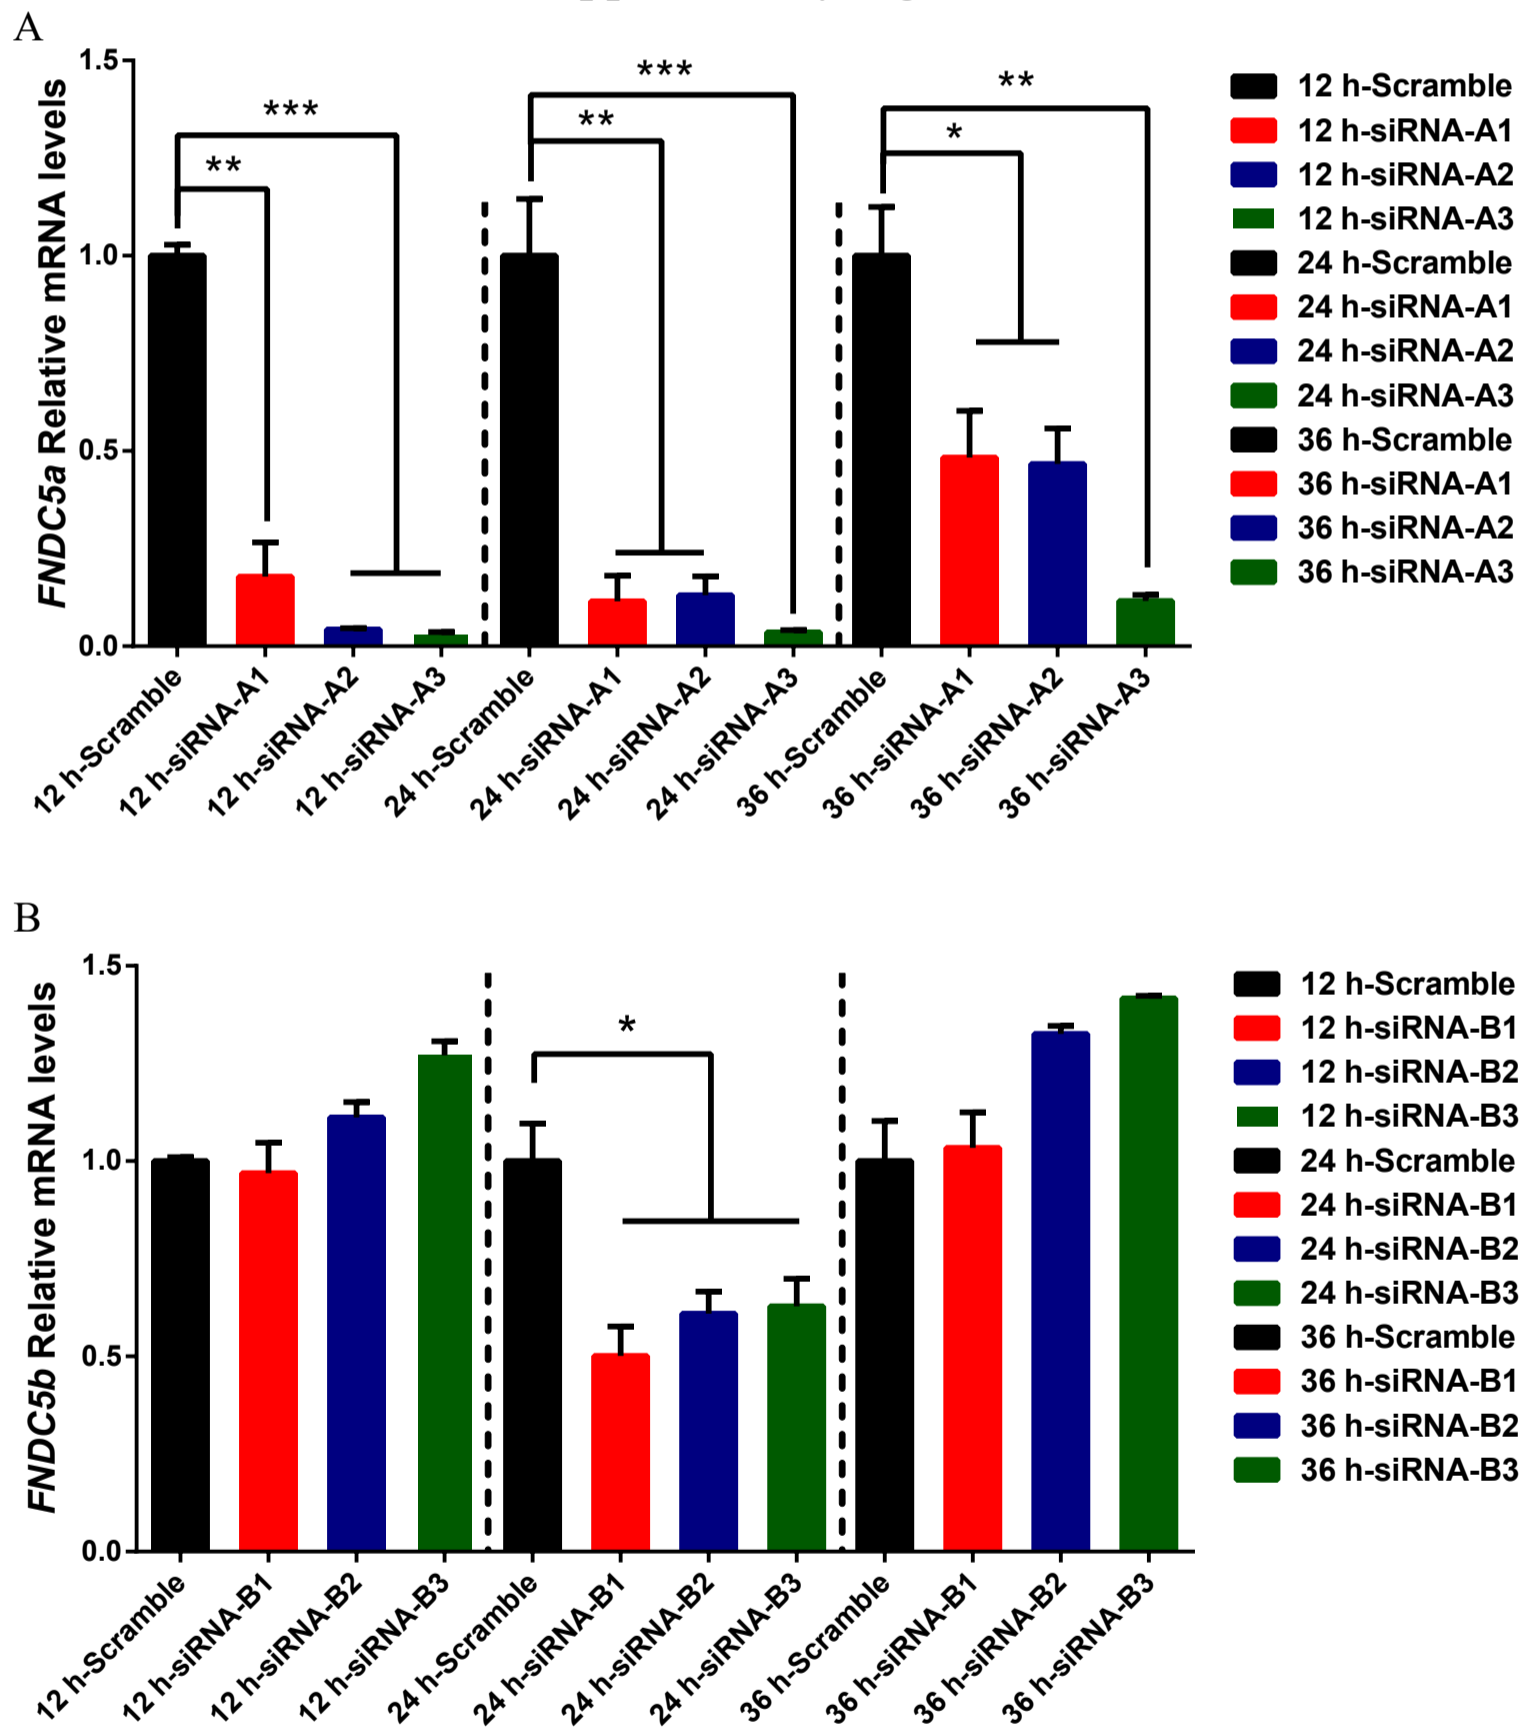

### Supplementary Figures 3

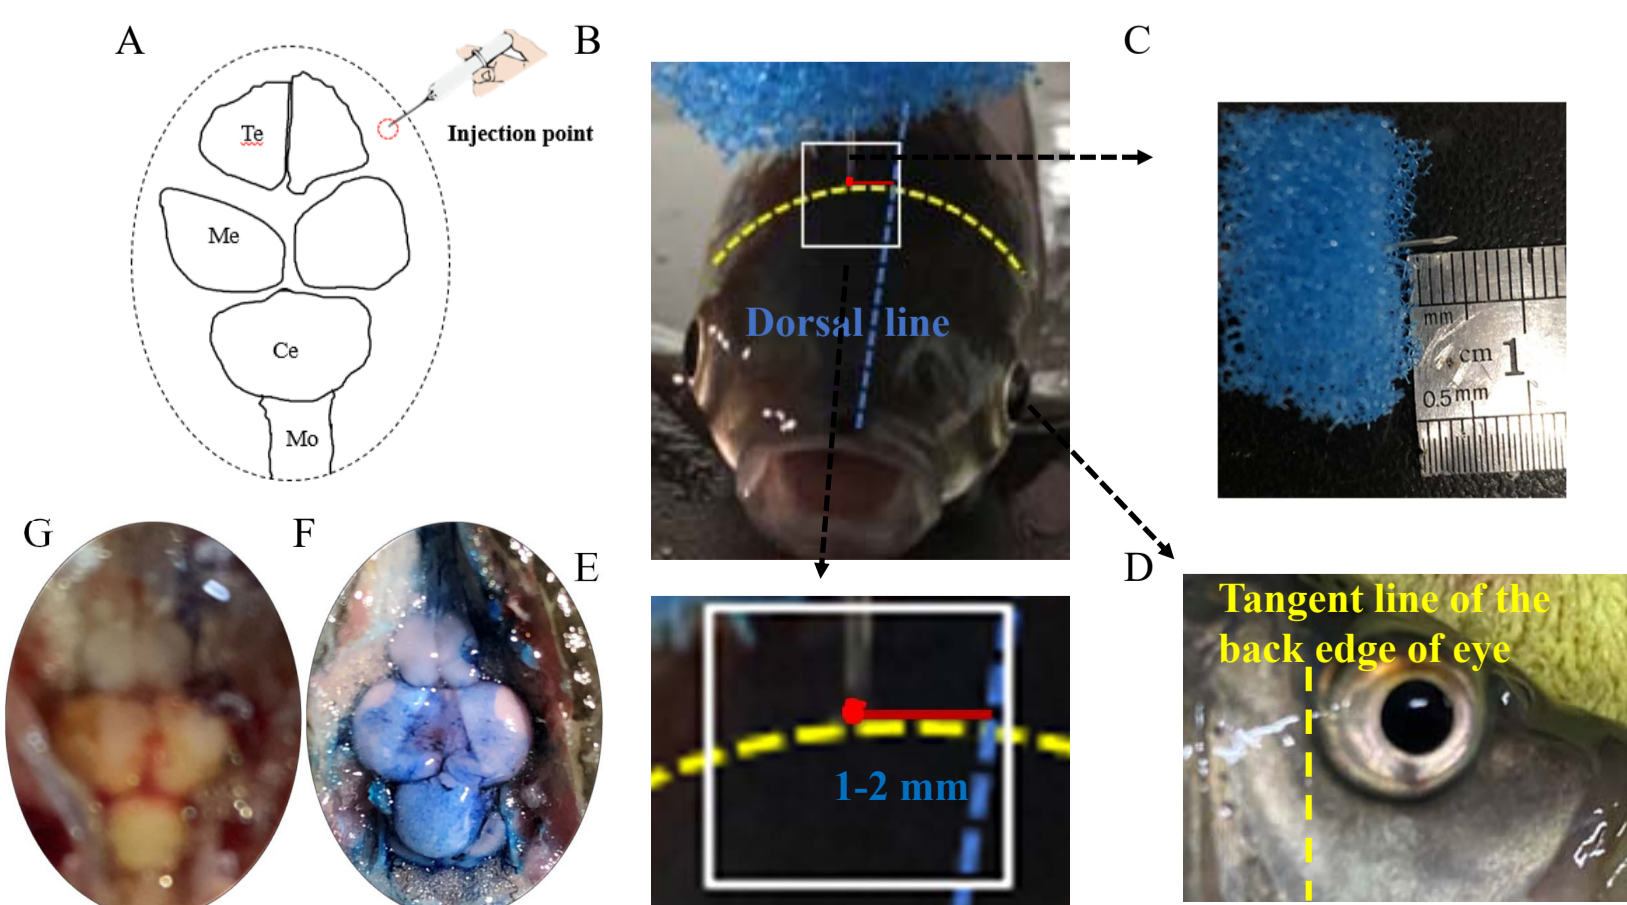

Supplement: f1 [file 1946960.f1.pdf]
